# Supplementary material
Source: MDPI journal article supplement (https://www.mdpi.com/2504-477X/6/2/41)

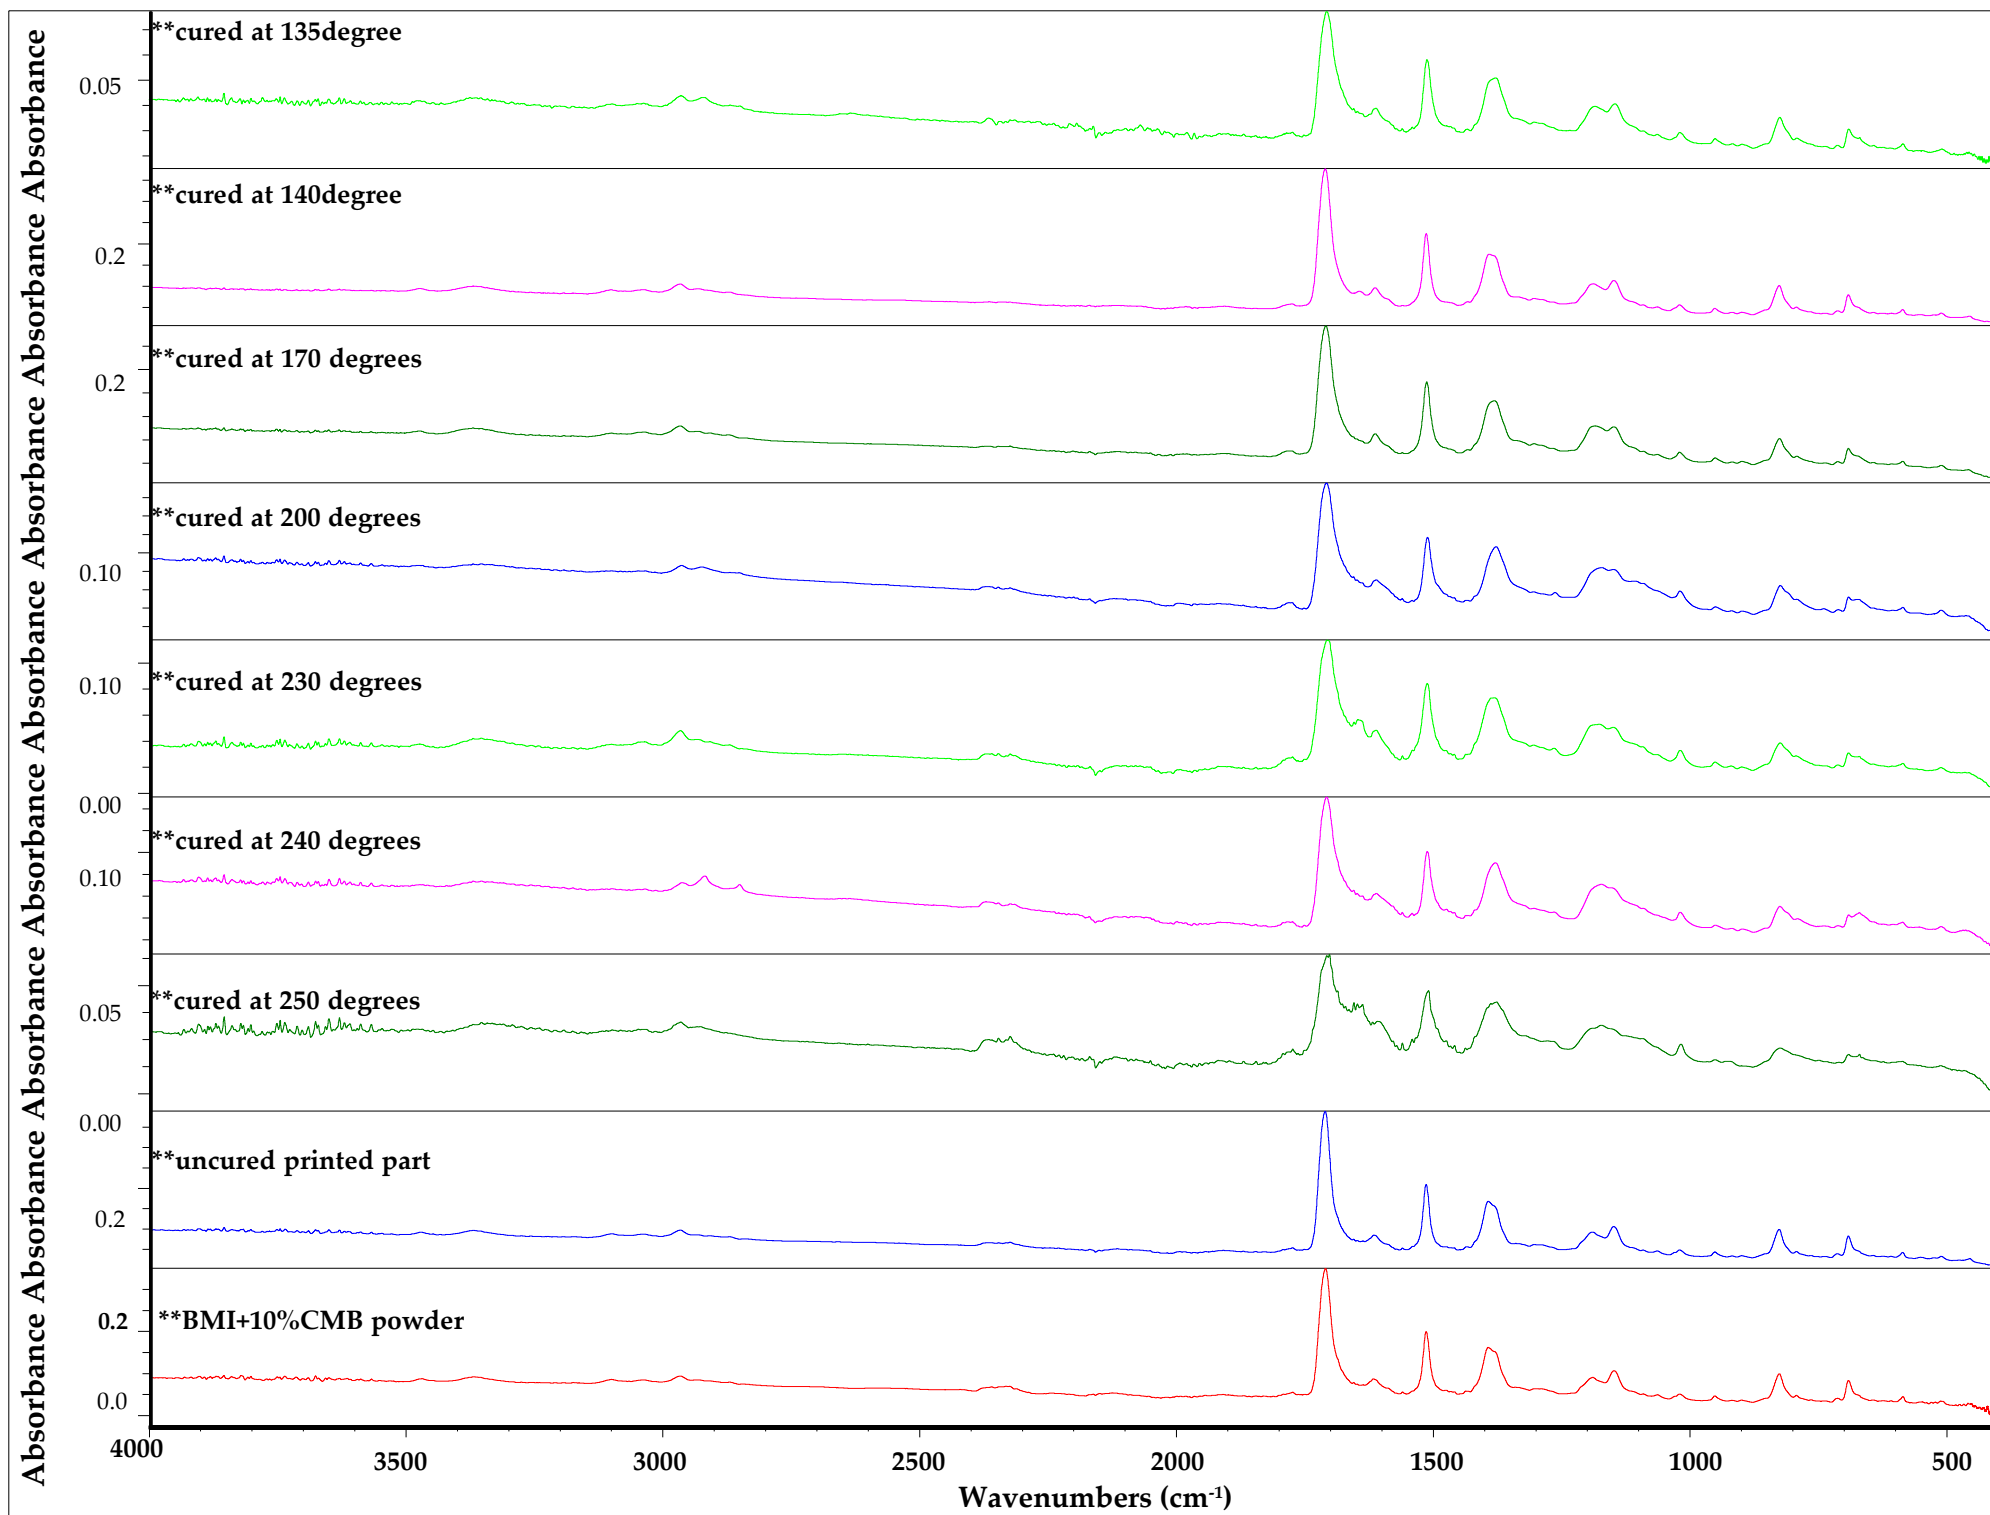

Supplement: s1 [file s1]
